# Supplementary material for: Photo-chemically induced polycondensation of a pure phenolic resin for additive manufacturing
Source: Royal Society of Chemistry journal article supplement (doi:10.1039/d1py01665b), 2022-01-01
Supplement: d1py01665b1.pdf [file d1py01665b1.pdf]

Supporting Information for:

# Photo-chemically induced polycondensation of a pure phenolic resin for additive manufacturing

Raffael Wolff,<sup>a</sup> Katharina Ehrmann,<sup>a</sup> Patrick Knaack,<sup>a</sup> Konstanze Seidler,<sup>b</sup> Christian Gorsche,<sup>b</sup> Thomas Koch,<sup>c</sup> Jürgen Stampfl<sup>c</sup> and Robert Liska<sup>\*a</sup>

<sup>a</sup> Institute of Applied Synthetic Chemistry, Technische Universität Wien, Getreidemarkt 9/163 MC, 1060 Vienna, Austria

<sup>b</sup> Cubicure GmbH, Gutheil-Schodergasse 17, Tech Park Vienna, 1230 Vienna, Austria

<sup>c</sup> Institute of Materials Science and Technology, Technische Universität Wien, Getreidemarkt 9/308, 1060 Vienna, Austria

## Experimental Part

### Synthesis of trioxymethylene-diacetate (TOMDA)

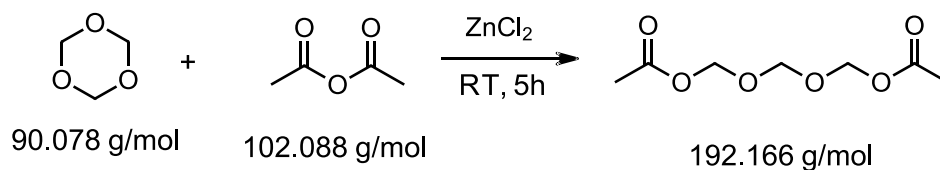

The synthesis of TOMDA was performed in accordance with the literature.<sup>1</sup> n-Trioxane (22.50 g, 250 mmol, 1 eq.) was mixed with freshly distilled acetic anhydride (25.55 g, 250 mmol, 1 eq.) and stirred with  $\text{ZnCl}_2$  (1.02 g, 7.5 mmol) at 25 °C for 5 h. The mixture was washed with saturated  $\text{NaHCO}_3$  solution followed by extraction with diethyl ether (3 x 200 mL). The organic phase was dried over  $\text{Na}_2\text{CO}_3$ . The solvent was evaporated and the crude product was purified by subsequent distillation to obtain the product as a clear liquid (40.12 g, 84 %).

$^1\text{H-NMR}$ : (400 MHz,  $\text{CDCl}_3$ )  $\delta$  (ppm): 5.36-5.33 (m, 4H,  $\text{CH}_2$  oxymethylen-1); 4.93-4.87 (m, 2H,  $\text{CH}_2$  oxymethylen-2); 2.10-2.09 (m, 6H,  $\text{CH}_3$ )

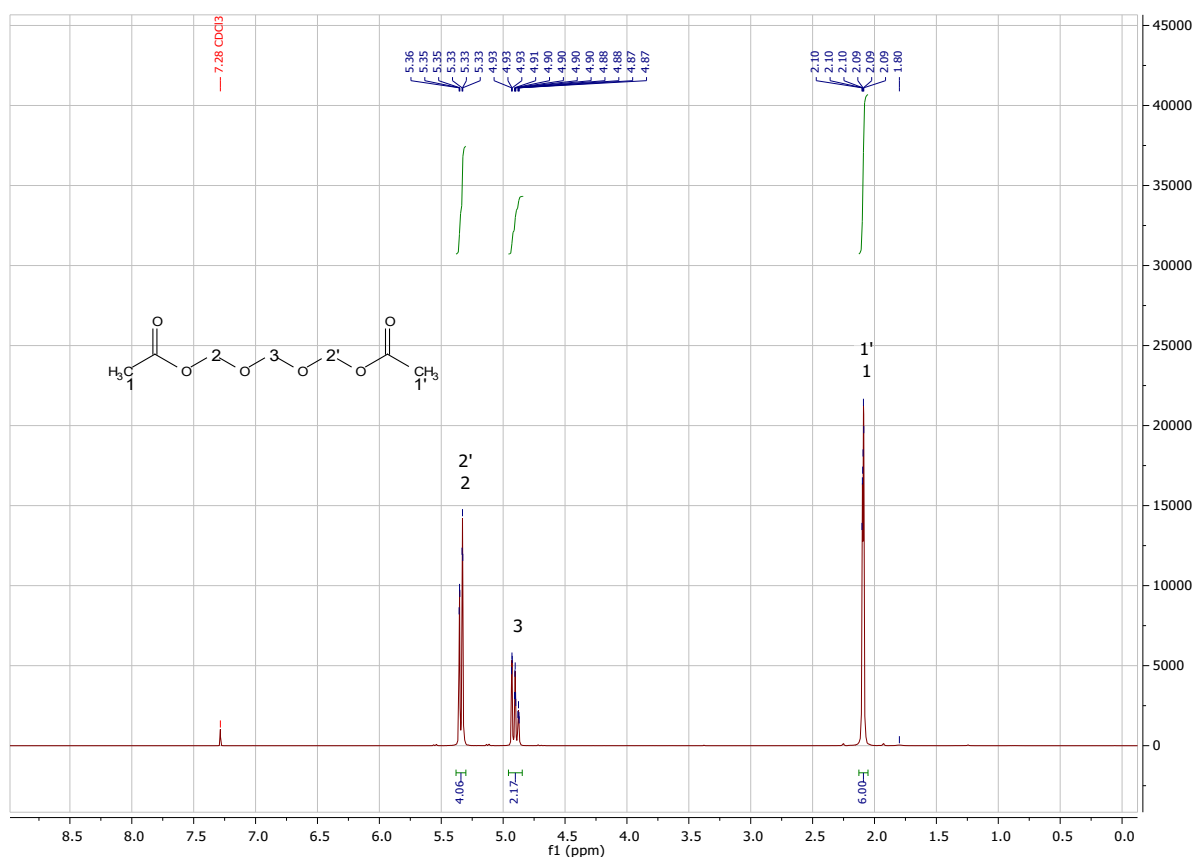

Figure S1:  $^1\text{H-NMR}$  of TOMDA ( $\text{CDCl}_3$ , 400 MHz)  $\delta$ : 5.36-5.33 (m, 4H), 4.93-4.87 (m, 2H), 2.10-2.09 (m, 6H)

## Photo-DSC

Table S1: Results of the photo-DSC experiments of the PF and TOMDA formulations.

| CA    | Temp. [°C] | $\Delta H$ [Jg <sup>-1</sup> ] | $T_{max}$ [s] |
|-------|------------|--------------------------------|---------------|
| PF    | 60         | 145 ± 10                       | 20 ± 1        |
|       | 80         | 240 ± 10                       | 13 ± 1        |
|       | 90         | 240 ± 10                       | 10 ± 1        |
|       | 100        | 160 ± 10                       | 8 ± 1         |
|       | 120        | 120 ± 10                       | 8 ± 1         |
| TOMDA | 80         | 360 ± 10                       | 14 ± 1        |
|       | 90         | 360 ± 10                       | 10 ± 1        |
|       | 100        | 345 ± 10                       | 9 ± 1         |
|       | 120        | 180 ± 20                       | 5 ± 1         |

## Microscopy of 3D printed object

The 3D printed objects were investigated by light microscopy. For that, the samples were prepared from rectangular specimens by grinding and polishing, which was done manually on rotating plates. The overview to observe macroscopic voids was recorded by a Keyence VHX 6000 optical microscope in panorama mode.

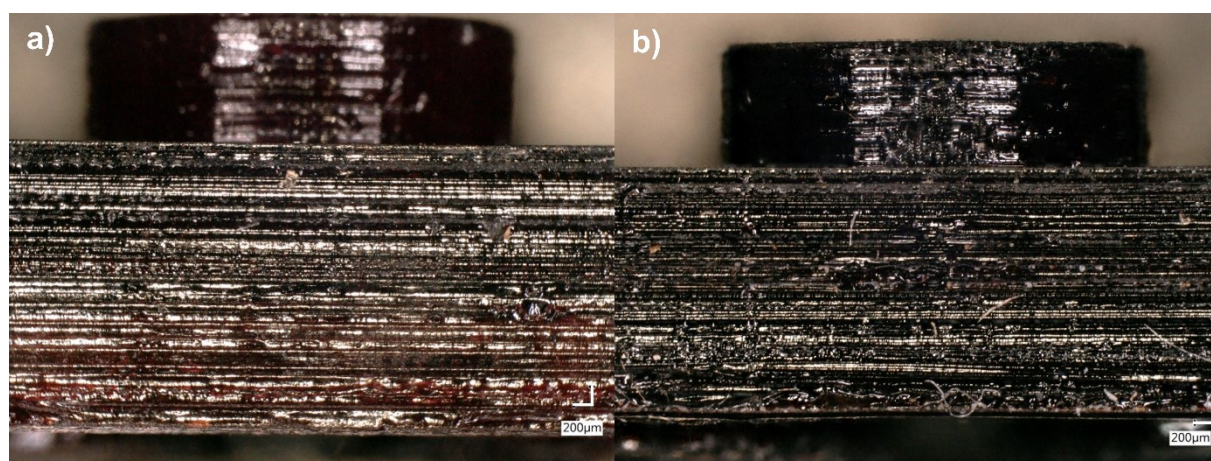

Figure S2: Microscopic image of the 3D printed object (a) before and (b) after the post-curing process.

## Tensile Tests

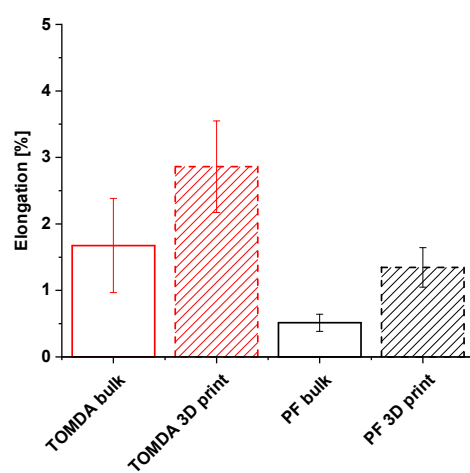

Figure S3: Elongation at break of bulk cured and 3D printed parts.
